# Supplementary material for: Associations among the plasma amino acid profile, obesity, and glucose metabolism in Japanese adults with normal glucose tolerance
Source: Nutr Metab (Lond). 2016 Jan 19;13:5. doi: 10.1186/s12986-015-0059-5 (PMC4717594; doi:10.1186/s12986-015-0059-5)
Supplement: Additional file 6: — Age- and gender-adjusted correlations between plasma amino acid concentration and indices of obesity and glucose metabolism. (XLS 20 kb) [file 12986_2015_59_MOESM6_ESM.xls]

## Sheet: Supplemental table 6
Additional file 6: Table S6: Age- and gender-adjusted correlations between plasma amino acid concentration and indices of obesity and glucose metabolism
		Body Weight		BMI		WC		VFA		SFA		FPG		OGTT 2h-PG		HOMA-IR		OGIS		HOMA-β		IGI
	P value	standarized coefficient	P value	standarized coefficient	P value	standarized coefficient	P value	standarized coefficient	P value	standarized coefficient	P value	standarized coefficient	P value	standarized coefficient	P value	standarized coefficient	P value	standarized coefficient	P value	standarized coefficient	P value	standarized coefficient
Essential AAs
Histidine	0.9421	-0.00594	0.8927	-0.01443	0.808	-0.02301	0.9866	0.001524	0.9074	0.012964	0.6335	0.052032	0.4162	-0.0925	0.9206	-0.01151	0.7732	0.030709	0.8944	-0.01449	0.877	-0.01737
Isoleucine	0.1794	0.118727	0.1535	0.165079	0.1164	0.160547	0.2806	0.10605	0.1477	0.174403	0.5893	-0.06408	0.9655	0.005373	0.3801	0.109915	0.9755	0.003557	0.1389	0.174538	0.1521	0.173671
Leucine	0.193	0.128146	0.3249	0.127135	0.1543	0.162358	0.0981	0.180067	0.1423	0.196688	0.2645	-0.14697	0.82	0.031411	0.2332	0.165806	0.7942	0.033666	0.0268	0.288131	0.0673	0.242734
Lysine	0.6543	0.038978	0.4943	0.077791	0.1428	0.146886	0.6132	-0.0488	0.1002	0.193579	0.1122	0.183331	0.0883	0.205213	0.1834	0.162635	0.1128	-0.17871	0.5598	0.067749	0.2523	0.13542
Methionine	0.6745	0.033685	0.6984	-0.04067	0.7309	0.031971	0.657	-0.0395	0.5255	0.069375	0.5055	0.071292	0.7359	0.037748	0.8661	0.019097	0.6063	-0.05389	0.8037	-0.02663	0.8655	-0.01881
Phenylalanine	0.2116	0.101936	0.9174	0.011129	0.749	0.030403	0.3783	0.07995	0.4876	0.077506	0.5565	-0.06437	0.8525	-0.02126	0.2517	0.132146	0.9845	-0.00208	0.0522	0.210118	0.2749	0.122628
Threonine	0.506	-0.05412	0.3161	-0.10659	0.8929	0.012712	0.7492	-0.02889	0.9945	0.000767	0.1291	0.164051	0.3485	0.106291	0.724	-0.0406	0.9816	0.00245	0.1393	-0.15977	0.5622	-0.06645
Tryptophan	0.6711	0.034521	0.752	0.033643	0.5141	0.061425	0.0201	0.206205	0.6322	0.053057	0.1951	-0.14006	0.4786	0.080284	0.6315	0.055029	0.443	0.081233	0.015	0.259275	0.2281	0.134902
Valine	0.033	0.202411	0.0477	0.246514	0.0067	0.295902	0.2754	0.116095	0.0067	0.3481	0.2404	0.15042	0.2716	0.147163	0.0042	0.379323	0.1954	-0.1618	0.0319	0.271939	0.001	0.419183
Non-essential AAs
Alanine	0.4503	0.059959	0.6463	0.047759	0.0427	0.184419	0.1273	0.13359	0.1437	0.157584	0.208	0.133185	0.4464	0.084369	0.2591	0.126239	0.3263	-0.10155	0.6056	0.054822	0.2538	0.125664
Arginine	0.6192	-0.03975	0.7613	-0.03182	0.6722	0.039226	0.3067	-0.09045	0.4086	0.089986	0.3404	0.101663	0.2037	0.14121	0.8416	0.022579	0.3162	-0.10428	0.8177	-0.02464	0.8255	0.024565
Asparagine	0.1073	-0.12733	0.0652	-0.19034	0.2475	-0.10638	0.0905	-0.14833	0.4529	-0.08145	0.1783	0.142532	0.9705	-0.00412	0.2966	-0.11704	0.8315	0.022117	0.06	-0.19798	0.1048	-0.17729
α-ABA	0.719	0.028604	0.3841	0.090398	0.5076	0.060999	0.4729	-0.06324	0.4705	0.078138	0.2899	0.112076	0.129	0.167222	0.6799	-0.0463	0.1856	-0.13657	0.1064	-0.1701	0.6546	-0.04911
Citrulline	0.0211	-0.18276	0.0054	-0.2864	<0.001	-0.35766	0.001	-0.28521	<0.001	-0.38155	0.8054	-0.02652	0.0969	-0.18508	0.0078	-0.29588	0.1428	0.153013	0.002	-0.32285	0.0046	-0.30749
Cystine	0.2705	0.09034	0.2793	0.116113	0.1181	0.14791	0.9254	-0.00855	0.3056	0.114587	0.131	0.164862	0.1933	0.14856	0.943	-0.0083	0.2778	-0.11606	0.3559	-0.10119	0.6844	-0.04612
Glutamate	0.0061	0.247364	0.0055	0.327454	0.0007	0.351612	<0.001	0.362141	0.001	0.401264	0.0009	0.394677	0.0144	0.309733	0.0005	0.435752	0.0012	-0.37736	0.0457	0.243486	0.001	0.403178
Glutamine	0.0009	-0.26508	0.0035	-0.30782	0.0024	-0.2823	0.0095	-0.23284	0.0009	-0.36175	0.8012	0.027814	0.0837	-0.19769	<0.001	-0.39498	0.1693	0.14738	0.0015	-0.34055	<0.001	-0.43386
Glycine	0.0055	-0.2205	<0.001	-0.36402	0.0005	-0.31584	<0.001	-0.30969	0.004	-0.31112	0.5703	-0.06159	0.0573	-0.21312	0.0037	-0.32461	0.0304	0.226108	0.0035	-0.30854	0.0005	-0.38009
Ornithine	0.6302	-0.03945	0.3983	-0.09044	0.5995	-0.04985	0.7381	-0.0304	0.8996	-0.01411	0.304	0.11223	0.2745	-0.12453	0.6067	0.05952	0.7373	0.035851	0.7717	-0.03176	0.9059	-0.01329
Proline	0.5413	-0.05049	0.2763	-0.11744	0.9243	-0.00911	0.9898	-0.00117	0.7326	0.038532	0.7358	0.037286	0.2823	-0.12365	0.4701	0.084218	0.4816	0.075816	0.3878	0.095181	0.5199	0.073536
Serine	0.1488	-0.12446	0.1908	-0.14636	0.1294	-0.14994	0.0887	-0.16079	0.1906	-0.15254	0.2973	0.119261	0.2663	-0.13276	0.2116	-0.15079	0.2718	0.122691	0.0128	-0.27997	0.1056	-0.19227
Taurine	0.6014	-0.04288	0.2894	-0.11351	0.8913	-0.01301	0.9517	-0.00552	0.6631	-0.04877	0.1281	-0.16579	0.7188	-0.04125	0.4485	-0.08772	0.5826	0.058824	0.5857	0.059733	0.6731	-0.04784
Tyrosine	0.044	0.163584	0.3323	0.104082	0.0701	0.170918	0.3217	0.090167	0.069	0.201876	0.0758	0.193258	0.138	0.169064	0.0485	0.226327	0.024	-0.23835	0.3006	0.113336	0.0963	0.187614
AA, amino acids; BMI, Body mass index; WC, Waist circumference; VFA, Visceral fat area; SFA, Subcutaneous fat area; FPG, Fasting plasma glucose; 2-h PG, 2-h plasma glucose; HOMA-IR, Homeostasis model assessment of insulin resistance; OGIS, Oral glucose insulin sensitivity; HOMA-β, Homeostasis model assessment for β-cell function index; II, Insulinogenic index; α-ABA, α-aminobutyric acid; Age- and…
